# Supplementary material
Source: PubMed Central journal article supplement (PMC7351615)
Supplement: NIHMS1585377-supplement-2.pdf [file NIHMS1585377-supplement-2.pdf]

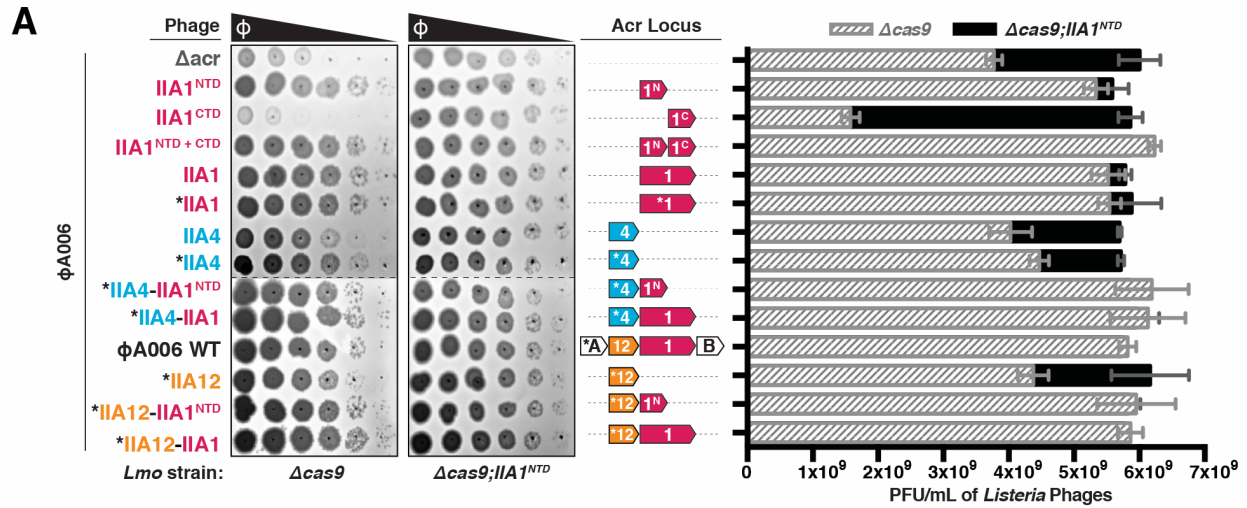

**Figure S1. Optimal ΦA006 Phage Replication Requires AcrIIA1<sup>NTD</sup>, Related to Figure 1**

Left: Representative images of plaquing assays where the indicated *Listeria* phages were titrated in ten-fold serial dilutions (black spots) on lawns of *Lmo10403s* (gray background) lacking Cas9 ( $\Delta cas9$ ) and encoding AcrIIA1<sup>NTD</sup> ( $\Delta cas9;IIA1^{NTD}$ ). Dashed lines indicate where intervening rows were removed for clarity. Right: Cas9-independent replication of isogenic ΦA006 phages containing distinct anti-CRISPRs. Asterisk (\*) indicates genes that contain the strong RBS associated with orfA in WT ΦA006, whereas unmarked genes contain their native RBS. Plaque forming units (PFUs) were quantified on *Lmo10403s* lacking *cas9* ( $\Delta cas9$ , gray shaded bars) and expressing AcrIIA1<sup>NTD</sup> ( $\Delta cas9;IIA1^{NTD}$ , black bars). Data are displayed as the mean PFU/mL of at least three biological replicates  $\pm$  SD (error bars). Note that this figure contains the same subset of data displayed in Figure 1A.

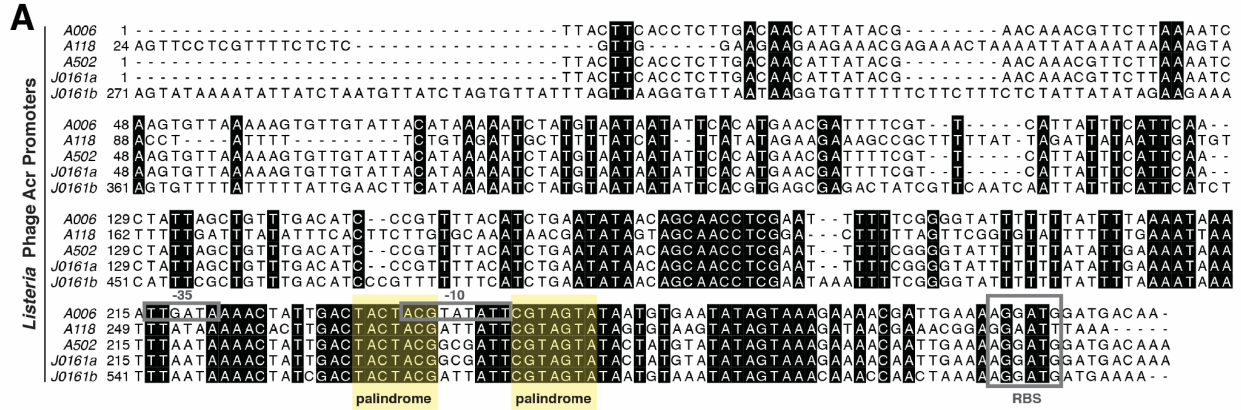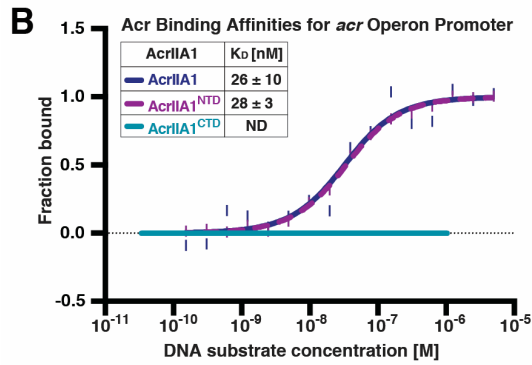

**Figure S2. AcrIIA1<sup>NTD</sup> Binds a Highly Conserved Palindromic Sequence in Acr Promoters, Related to Figure 2**

(A) Alignment of the phage anti-CRISPR promoter nucleotide sequences denoting the -35 and -10 elements and ribosomal binding site (RBS) (gray boxes) and conserved palindromic sequence (yellow highlight). (B) Quantification of DNA binding abilities ( $K_D$ ; boxed inset) of full-length AcrIIA1 and each domain (AcrIIA1<sup>NTD</sup> and AcrIIA1<sup>CTD</sup>) using microscale thermophoresis. Data shown are representative of three independent experiments. ND indicates no binding detected.



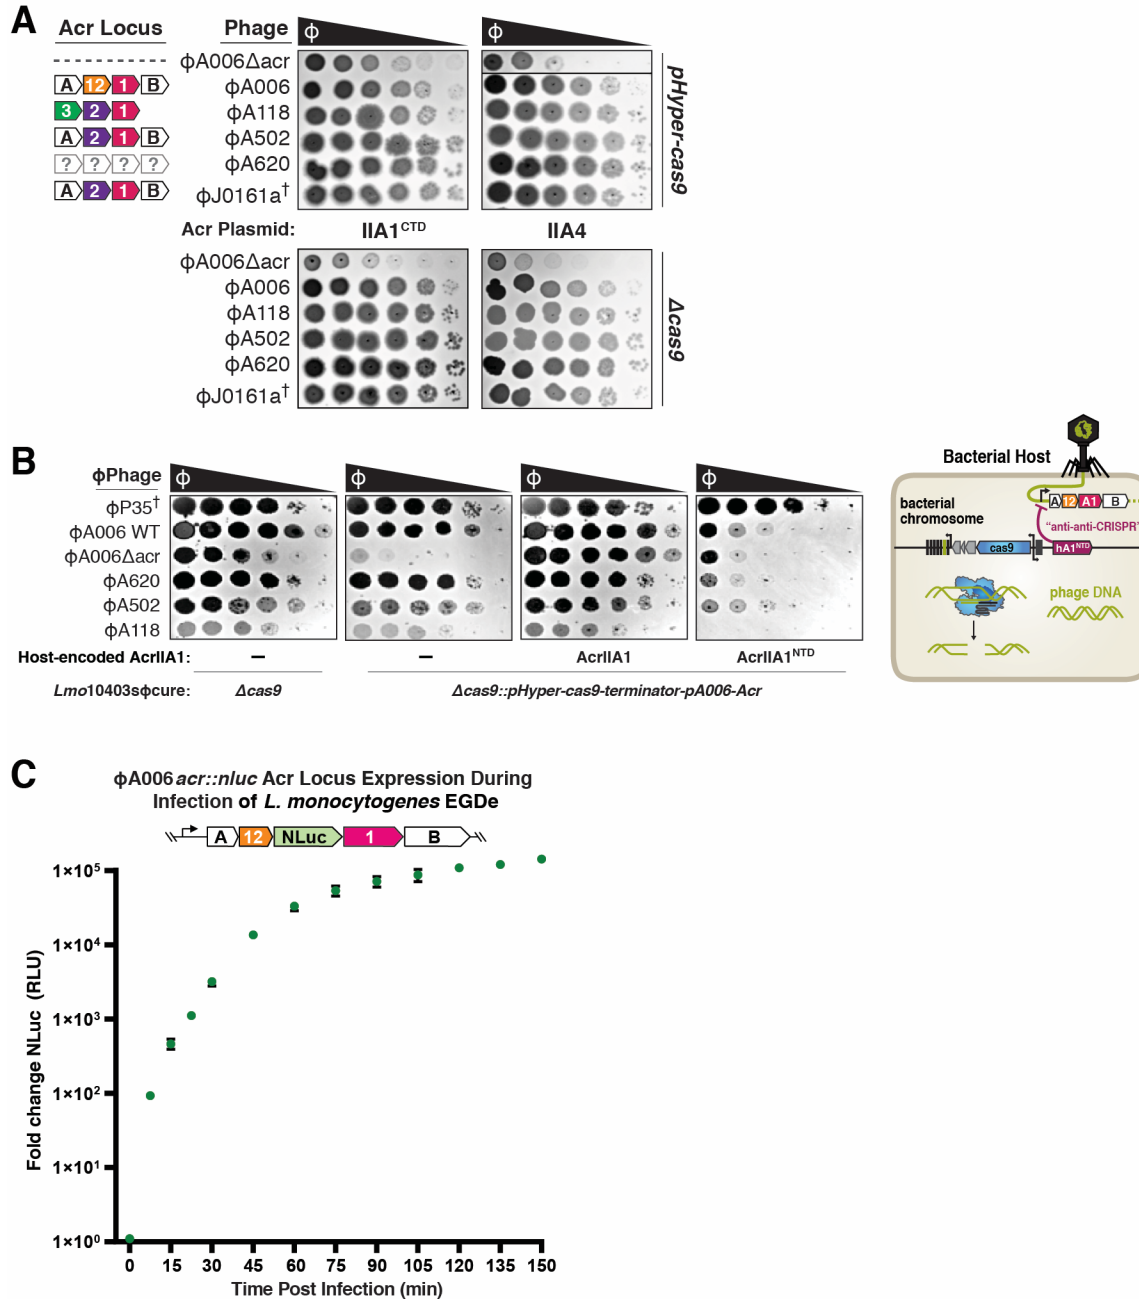

**Figure S4. Bacterial expression of AcrIIA1<sup>NTD</sup> blocks phage anti-CRISPR deployment, Related to Figure 4**

(A) Plaquing assays where the indicated *L. monocytogenes* phages are titrated in ten-fold dilutions (black spots) on lawns of *L. monocytogenes* (gray background) expressing anti-CRISPRs from plasmids, LmoCas9 from a strong promoter (*pHyper-cas9*) or lacking Cas9 ( $\Delta$ cas9), and the natural CRISPR array containing spacers with complete or partial matches to the DNA of each phage. ( $\dagger$ ) Denotes the absence of a spacer targeting the  $\phi$ J0161a phage. Representative pictures of 3 biological replicates are shown. Solid lines indicate where separate images are shown. (B) Left panels: Plaquing assays where wild-type *L. monocytogenes* phages are titrated in ten-fold dilutions (black spots) on lawns of *L. monocytogenes* (gray background) containing single-copy integrated constructs expressing AcrIIA1 or AcrIIA1<sup>NTD</sup> from the  $\phi$ A006

anti-CRISPR promoter (pA006), LmoCas9 from a constitutive promoter (pHyper-Cas9), and the natural CRISPR array containing spacers with complete or partial matches to the DNA of each phage. (†) Denotes the absence of a spacer targeting the virulent phage  $\Phi$ P35. Representative pictures of 3 biological replicates are shown. Right panel: Schematic of bacterial “anti-anti-CRISPR” activity where host-encoded AcrIIA1<sup>NTD</sup> (hA1<sup>NTD</sup>) blocks the expression of anti-CRISPRs from an infecting phage. (C) Nanoluciferase (NLuc) expression from the anti-CRISPR locus promoter of an  $\Phi$ A006 reporter phage ( $\Phi$ A006*acr::nluc*) during lytic infection of *L. monocytogenes* EGDe. Data are shown as the mean fold change in RLU (relative luminescence units) of three biological replicates  $\pm$  SD (error bars).

**Table S1. AcrIIA1 homolog protein accession numbers and associated promoter sequences, Related to Figures 3 and 4**

| Strains Containing AcrIIA1 Homologs                       | Designated Homolog Name | Protein Accession # | Associated Promoter Sequence (5' to 3')                                                                                                                                                                                                                                                                                                                                                                                                                                                                                   |
|-----------------------------------------------------------|-------------------------|---------------------|---------------------------------------------------------------------------------------------------------------------------------------------------------------------------------------------------------------------------------------------------------------------------------------------------------------------------------------------------------------------------------------------------------------------------------------------------------------------------------------------------------------------------|
| <i>Listeria monocytogenes</i> J0161                       | LmoϕA006/<br>ϕJ0161     | WP_003722518.1      | tttactcacccttgacaacattatcgaacaacgcttcttaaaatcaagtgtaaaaagtgtgtatta<br>cataaaaaatcctatgtaataattcacalgaaacgatttctcattattcattcaacttagcgtttga<br>catcccgctttatcatctgaatataacagcaacctcgaatttccggggtattttatgtaaaataaatt<br>taataaaactatgactactacggcgtatctagatataatgataaagaacaaatgaaa<br>aggatggatgacaaa                                                                                                                                                                                                                         |
| <i>Listeria monocytogenes</i> strain LMO10                | LMO10                   | KUG37233.1          | ttttgtgacgcttcacaaagacatgtttatatataccaagaacttaataagttctagcgctgttccg<br>gcggttaattacgcattgtgcaatgaaattctatgtaatttaatttagcgcgaaaagaagcctaca<br>aattttaactactactatgaaatgaaagaaaaaacacagactcgggttagtgatttttaactgtaaa<br>aaaattaatccaataaaaaaccattgactactacgattatctagatataatgataatgaaagaa<br>cggggagaaaataca                                                                                                                                                                                                                   |
| <i>Listeria monocytogenes</i> strain FRRB 2887            | LmoFRRB2887             | WP_085696370.1      | aataaaaagtaacctgtttctatagattgctttatcalatataagaagaagccgtttttatagatt<br>ataattgattgtttttgatttatttccactccctgcaaaaacgatagatagcaacctgcaacttttg<br>ttcggggattttttgaaataattataaaaacactgactactacgaatttccagtagtatacttaaatat<br>agtaaaagataaacgaaacggaggaaactaaaa                                                                                                                                                                                                                                                                   |
| <i>Listeria monocytogenes</i> isolate 22B09               | Lmo22B09                | WP_077316628.1      | ttttacagtttttaaaaagggttcttctgtaaaacgcctatagtagccgtttatagatagatgcc<br>tttttcttctgttgaatcggtatattccagaaaagtttgcacgaatttgcacaaaatgcccgttga<br>taattcttataaatatagtagtgcctcggactttalgggtcggggtatttttgaataattataaaaac<br>actgactactcgaatttccagtagtatacttaaatatagtaaaagatacgaacggaaggaacttaa<br>aa                                                                                                                                                                                                                               |
| <i>Listeria seeligeri</i> FSL S4-171                      | Listeria seeligeri      | EFS02359.1          | tgaaatgatgtacgaacgttcttcttagtagaataagaccctcgcgcaaaaaagatatta<br>ctttccgacttaactcgtgtagaattttcaaatgctgcaaaatcaaaaataaataatgaaatata<br>gttgaactaatacgaaaaactcgtatctagtagatatagtaaaagaaacgggaggaactaaaa<br>tggtcgtatttagactataccgtaaaattcgtacaacatgactcggagataatcgtttatataatgaga<br>agattataataaaaaaattgaaaacgtgatttaacagagttttcaaaaataatagaaaataac<br>cgtaaaaattcgtccaactgatacgggcccccaaaaattgaaagtaaatgagcgaacactctgatttc<br>tccgatttcggaagtataatagtgtaaaagttgggataaggaatagcactccgctaacttaataaa<br>taaaatlaaaagggatgaatgaa |
| <i>Listeria monocytogenes</i> CFSAN026587 plasmid         | Lmo plasmid             | WP_061665673.1      | aacttcaaatagtagaggcgttgcctcaatcattgctgatgcttaagaagtcagattaaaaatag<br>atatcttataactttataaattatagtgactataaataatagataaaaggtatagagataa<br>gacataaaaatagaacaaatagggtgcaatgac                                                                                                                                                                                                                                                                                                                                                   |
| <i>Leuconostoc gelidum</i> subsp. gasicomitatum KG16-1    | Leu gelidum             | CUR63869.1          | tatttttccctaaaataatagtagctttaaacaagatgaactcttaattgattttgccattagatata<br>actgtacaacaactgtaacattaactttgcaactgcttaataagcggtagtaacttaacaaaggtta<br>aggaagggtaaacgcac                                                                                                                                                                                                                                                                                                                                                          |
| <i>Lactobacillus parabuchneri</i> strain FAM23166         | Lac parabuchneri        | WP_084975236.1      | aacccctgtagcataaaagggttgaactcctcggcagtgcaaatcgggtaaacatcagcttccg<br>atattcgttaatgtagcctcagctctttagatgagagattggagcattttttgcttttaaaaacg<br>atgtttatattgcatctcgtcgtacagtagtaatttttaaaaacatgaagtgcgacacacagttaac<br>ttcgtttatttaacagtaaatcagggagaaaaaca                                                                                                                                                                                                                                                                       |
| <i>Enterococcus faecalis</i> strain plasmid Efsorialis-p2 | E. faecalis             | WP_002401838.1      | ctaccataagttactatgagaagaaccaacagatagctctgttgcttctttttgctcagttgta<br>ccaggtcagtagtaggacattcaaatgggcatacgcattgtgtaatttgatcgtcttaaatata<br>catglaalgaataaagaattgggtattcgtttccaclaacgcccacaaagatagataggtggaaga<br>acaaatttaacgcaaatgtaattgattgttttaacttaccctatagtagataataaagtgaatca<br>aagaagcctactctgaaaattcaagaataggcaggtcgtcaaacctcttgattataccatataca<br>aaggaagaaggaatgaaa                                                                                                                                                |
| <i>Listeria monocytogenes</i> SLCC2540, serotype 3b       | Lmo orfD                | WP_012951927.1      | acaagaacatgcaaaatttttaaaaagccgtcagctgcgcatcttttaagaagaaaaagccac<br>ttagaagactggaagaactagaaattgcagtaagcagaagaaactgaataattcattaga<br>caatagcccgtgaagaaaatttcggggcattttttttataactaaataatgactaaactcaata<br>tatcgtttactatataatagtaaaagacgggagggcgtacata                                                                                                                                                                                                                                                                        |
| <i>Lactobacillus delbrueckii</i> strains                  | Lac delbrueckii         | OOV09772.1          | not applicable; AcrIIA1 <sup>NTD</sup> homolog in core bacterial genomes found next to Type I-E, I-C, or II-A CRISPR-Cas systems                                                                                                                                                                                                                                                                                                                                                                                          |
| <i>Lactobacillus phage</i> phig1e                         | ϕPhig1e                 | NP_695149.1         | atccctcatgaatcgtatgctacacctgtgctgggttaaacccagaacgggtttttttgtaaaata<br>tacaataaaaactaaaagttaacacaatagtttacaagtaatacaaaaagggttaaatatgatttg<br>tagaaaagaaaggaagcttaaaa                                                                                                                                                                                                                                                                                                                                                       |
| <i>Lactobacillus sakei</i> prophage                       | Lac sakei               | WP_076789011.1      | tcttgaccactccttaaaaaattatatacgaacataactctttgtcaaaattaaatcaactttactta<br>aatatattgactatacctcaatattgtattatataaatggaagagggtgagagacatcggttct<br>agggtagaaaaaaagaaaccgactcgaagaaagaaagcgaagcgaatgaatacagactgg<br>ctgcatatacattataatcgtcttagcatttcaaaagattggttcaagacacagggcgaaag<br>ccctgtttgctactataatcattgctgctatgaaagacaaaagacacgcaactatggcacta<br>tctatagctctatcattcagcgttggcactctgttaaaattctttagggagccttttg                                                                                                                |
| <i>Lactobacillus phage</i> Lrm1                           | ϕLrm1                   | YP_002117689.1      | acaatatgctcctcgtcgtcaacgcccgttggagggtctttttgttgaacttttttaaaaataatcaact<br>ttatgtagtagtagcgaataggtactatataaacgtaagaagaggaggaaacaaa                                                                                                                                                                                                                                                                                                                                                                                         |
| <i>Lactobacillus helveticus</i> prophage                  | Lac helveticus          | WP_023060950.1      | taaaatttctatttcaataaattctcaaaattatattctttttgaactcgttaggtgagatt<br>ttgaaaaataccttaataagaagaaacatctattatactgatacaaatgaaattaaatgaaag<br>gtgcccgaagat                                                                                                                                                                                                                                                                                                                                                                         |
| <i>Lactobacillus paragresseri</i>                         | Lac paragresseri        | WP_003649108.1      | aaatttaaaatagttgaaatagcgaattagtagcttgaagtagtaacttttatttttaattgaa<br>gttttttcgaaaatagcctttgatttaaaataaggatagtaataacagtgaggatactt                                                                                                                                                                                                                                                                                                                                                                                           |
| <i>Lactobacillus brevis</i> transposon                    | Lac brevis              | WP_085769627.1      | cctgggtgataatcccggtatacccgagtgtagtctgaaactgtgtaattactagtaacctaattt<br>tccgtcgtgaaatgttccctcaaaaaccccctagagatgacactttattttaaagtgtcaacc<br>ctaaaggggttagtcagagaagaccagactgttttattagtagtaaaagagggtgaaacatggc<br>ggaaacccaattttgtagaaatagcagcaagcgttctcaattttttgtagatagatgta<br>aaattaatccgacgctgttcggaacaaaagatcagctccttaaaatgggtttaccacaacccc<br>atcttttagggactgactct                                                                                                                                                       |
| <i>Lactobacillus fermentum</i> MGE                        | Lac fermentum           | WP_057195093.1      | gatcgactacagccctcataaaaccggttcccccactacatagaataatataatggcattagctcag<br>gtagatgctctctcattccttgagctgccatcactatagggaaggtatgactaatttttgatgcgc<br>attcaaatagtgtaattatcattctccttccattatccgttccactgcccactcgcctcaagtaatt<br>gaaaggtcccaaaa                                                                                                                                                                                                                                                                                        |
